# Supplementary material
Source: PubMed Central journal article supplement (PMC3228171)
Supplement: supp_the2010-0349_Supplemental_Online_Tables_1-3_SECURE.pdf [file supp_the2010-0349_Supplemental_Online_Tables_1-3_SECURE.pdf]

**Supplemental Online Table 1.** Primers used for real-time PCR amplification of *BCL2L12*, *BCL2*, and *GAPDH*.

| <b>Gene</b>           | <b>Primer sequence</b>       | <b>Length of the PCR product (bp)</b> | <b>T<sub>m</sub> of the PCR product (°C)</b> |
|-----------------------|------------------------------|---------------------------------------|----------------------------------------------|
| <b><i>BCL2L12</i></b> | 5'-CCCTCGGCCTTGCTCTCT-3'     | 86                                    | 81.7                                         |
|                       | 5'-GGGCCACCAAAGCATAGAAG-3'   |                                       |                                              |
| <b><i>BCL2</i></b>    | 5'-TCGCCCTGTGGATGACTGA-3'    | 134                                   | 82.2                                         |
|                       | 5'-CAGAGACAGCCAGGAGAAATCA-3' |                                       |                                              |
| <b><i>GAPDH</i></b>   | 5- CCTCCCGCTTCGCTCTCT-3'     | 116                                   | 80.1                                         |
|                       | 5'-CCGTTGACTCCGACCTTCAC-3'   |                                       |                                              |

**Supplemental Online Table 2.** *BCL2L12* and *BCL2* mRNA expression analysis in CLL patients and healthy controls.

| Variable                                                         | Mean $\pm$ S.E. <sup>b</sup>  | Median | Range            |
|------------------------------------------------------------------|-------------------------------|--------|------------------|
| <i>BCL2L12</i> <sup>a</sup> in CLL patients ( <i>n</i> = 64)     | 204.7 $\pm$ 19.6              | 171.8  | 0.14 – 729.5     |
| <i>BCL2L12</i> <sup>a</sup> in healthy controls ( <i>n</i> = 23) | 61.3 $\pm$ 19.4               | 17.9   | 0.14 – 403.6     |
|                                                                  | <i>p</i> < 0.001 <sup>c</sup> |        |                  |
| <i>BCL2</i> <sup>a</sup> in CLL patients ( <i>n</i> = 65)        | 12,734.2 $\pm$ 1440.9         | 9254.0 | 204.0 – 46,559.0 |
| <i>BCL2</i> <sup>a</sup> in healthy controls ( <i>n</i> = 23)    | 5563.1 $\pm$ 2076.6           | 1874.0 | 27.0 – 45,887.0  |
|                                                                  | <i>p</i> < 0.001 <sup>c</sup> |        |                  |

<sup>a</sup> c/Kc: mRNA copies / 1000 *GAPDH* mRNA copies.

<sup>b</sup> Standard error of the mean.

<sup>c</sup> Calculated using the Mann-Whitney *U* test.

**Supplemental Online Table 3.** Relationships between the studied continuous variables in CLL patients, assessed by Spearman correlation coefficient.

|                              |                      | <i>BCL2L12</i> | <i>BCL2</i>  | WBC <sup>a</sup> | Lymphocytes      | Age          | Early apoptosis index | CD38             |
|------------------------------|----------------------|----------------|--------------|------------------|------------------|--------------|-----------------------|------------------|
| <b><i>BCL2L12</i></b>        | <i>r<sub>s</sub></i> | 1.000          | 0.345        | 0.239            | 0.241            | -0.279       | -0.110                | -0.236           |
|                              | <i>p</i>             | —              | <b>0.005</b> | 0.057            | 0.055            | <b>0.026</b> | 0.483                 | 0.119            |
| <b><i>BCL2</i></b>           | <i>r<sub>s</sub></i> | 0.345          | 1.000        | 0.367            | 0.338            | -0.223       | -0.342                | -0.423           |
|                              | <i>p</i>             | <b>0.005</b>   | —            | <b>0.003</b>     | <b>0.006</b>     | 0.074        | <b>0.025</b>          | <b>0.004</b>     |
| <b>WBC<sup>a</sup></b>       | <i>r<sub>s</sub></i> | 0.239          | 0.367        | 1.000            | 0.978            | -0.039       | -0.310                | -0.617           |
|                              | <i>p</i>             | 0.057          | <b>0.003</b> | —                | <b>&lt;0.001</b> | 0.757        | <b>0.043</b>          | <b>&lt;0.001</b> |
| <b>Lymphocytes</b>           | <i>r<sub>s</sub></i> | 0.241          | 0.338        | 0.978            | 1.000            | 0.005        | -0.322                | -0.604           |
|                              | <i>p</i>             | 0.055          | <b>0.006</b> | <b>&lt;0.001</b> | —                | 0.966        | <b>0.035</b>          | <b>&lt;0.001</b> |
| <b>Age</b>                   | <i>r<sub>s</sub></i> | -0.279         | -0.223       | -0.039           | 0.005            | 1.000        | 0.020                 | 0.171            |
|                              | <i>p</i>             | <b>0.026</b>   | 0.074        | 0.757            | 0.966            | —            | 0.901                 | 0.262            |
| <b>Early apoptosis index</b> | <i>r<sub>s</sub></i> | -0.110         | -0.342       | -0.310           | -0.322           | 0.020        | 1.000                 | 0.012            |
|                              | <i>p</i>             | 0.483          | <b>0.025</b> | <b>0.043</b>     | <b>0.035</b>     | 0.901        | —                     | 0.939            |
| <b>CD38</b>                  | <i>r<sub>s</sub></i> | -0.236         | -0.423       | -0.617           | -0.604           | 0.171        | 0.012                 | 1.000            |
|                              | <i>p</i>             | 0.119          | <b>0.004</b> | <b>&lt;0.001</b> | <b>&lt;0.001</b> | 0.262        | 0.939                 | —                |

<sup>a</sup> White blood cells.
