# Supplementary material
Source: PubMed Central journal article supplement (PMC3228171)

**A**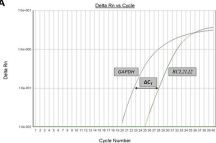**B**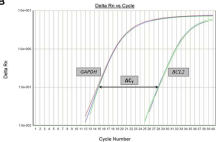

Supplement: supp_the2010-0349_Supplemental_Online_FIG1_SECURE.pdf [file supp_the2010-0349_Supplemental_Online_FIG1_SECURE.pdf]
